# Supplementary material for: Short- vs. Long-Course Antibiotic Treatment for Acute Streptococcal Pharyngitis: Systematic Review and Meta-Analysis of Randomized Controlled Trials
Source: MDPI journal article supplement (doi:10.3390/antibiotics9110733), 2020-10-26
Supplement: s1 [file s1]

## Supplemental Data

Short- versus long-course antibiotic treatment for acute streptococcal pharyngitis: systematic review and meta-analysis of randomised controlled trials.

Anna Engell Holm, Carl Llor, Lars Bjerrum, Gloria Cordoba

### Content:

|                             |         |
|-----------------------------|---------|
| Supplemental Figure S1..... | page 2  |
| Supplemental Figure S2..... | page 3  |
| Supplemental Figure S3..... | page 4  |
| Supplemental Figure S4..... | page 5  |
| Supplemental Figure S5..... | page 6  |
| Supplemental Figure S6..... | page 7  |
| Supplemental Figure S7..... | page 8  |
| Supplemental Figure S8..... | page 9  |
| Supplemental Figure S9..... | page 10 |

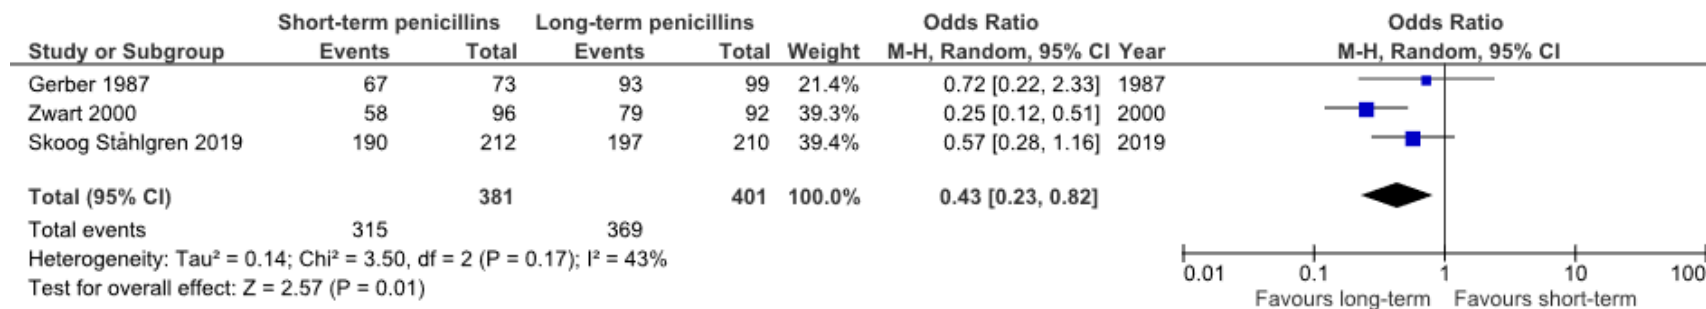

**Fig. 1. Early clinical cure of short-term penicillins compared to long-term penicillin therapy**

Figure S1. Early clinical cure of short-term penicillins compared to long-term penicillin therapy.

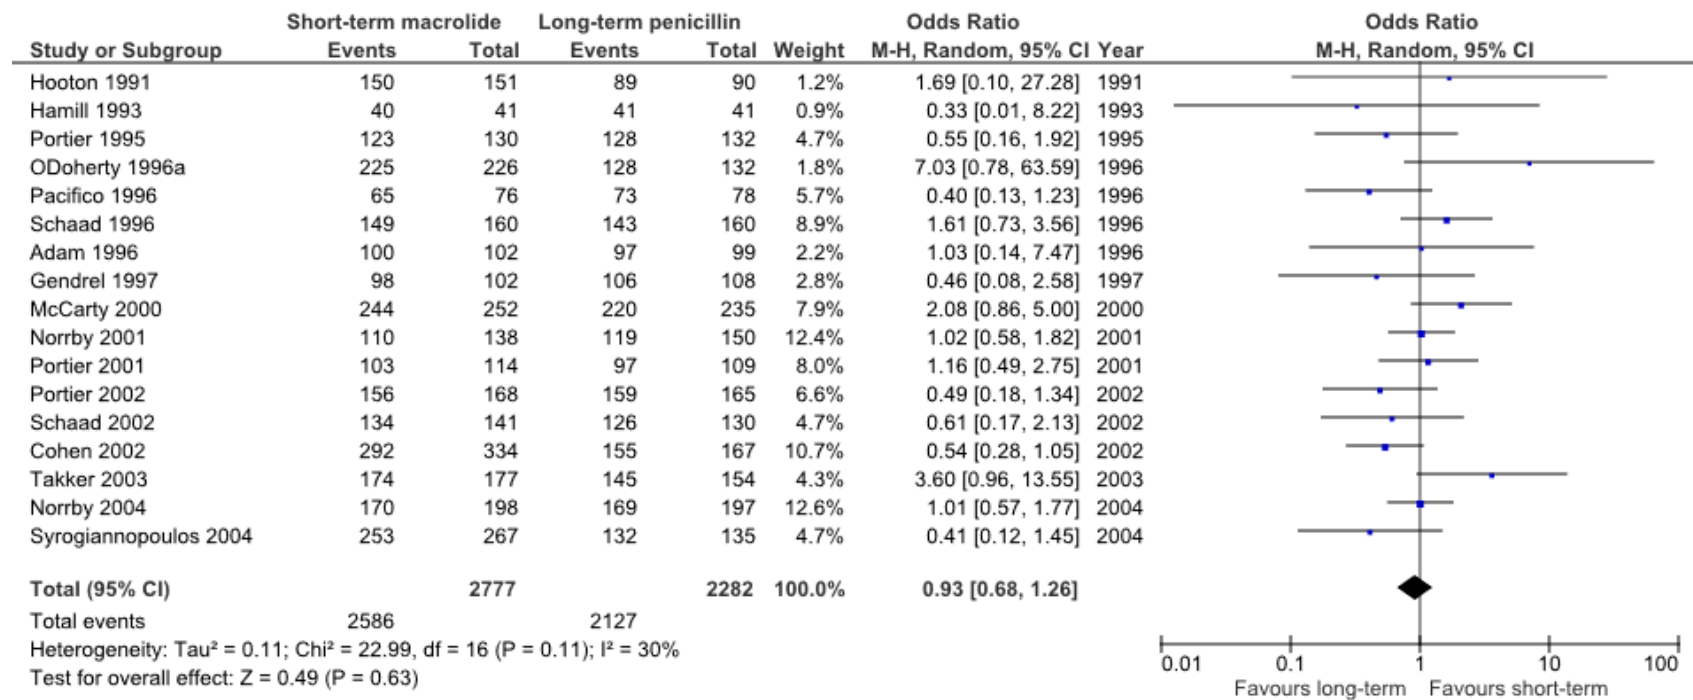

**Fig. 2. Early clinical cure of short-term macrolides compared to long-term penicillin therapy**

Figure S2. Early clinical cure of short-term macrolides compared to long-term penicillin therapy.

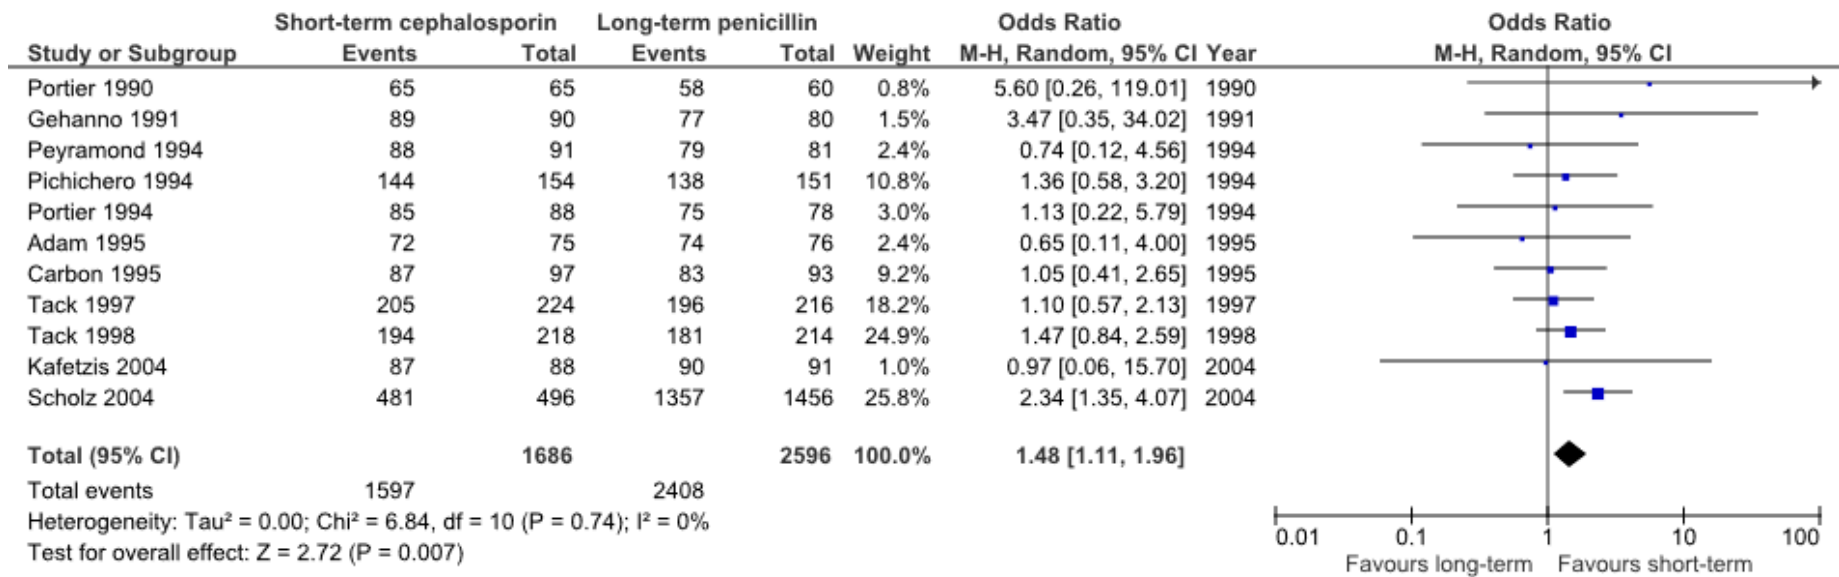

**Fig. 3. Early clinical cure of short-term cephalosporins compared to long-term penicillin therapy**

Figure S3. Early clinical cure of short-term cephalosporins compared to long-term penicillin therapy.

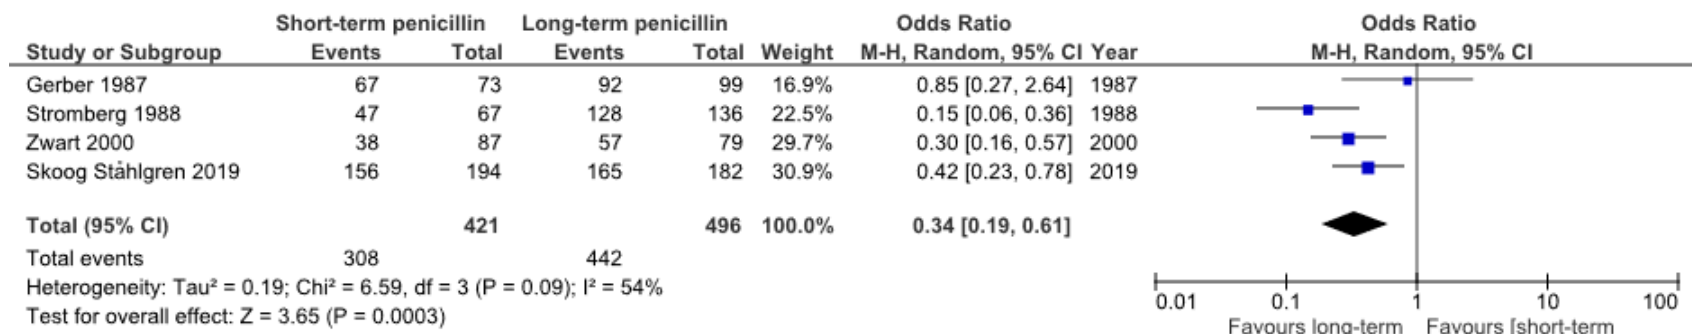

**Fig. 4. Early bacteriological eradication of short-term penicillins compared to long-term penicillin therapy**

Figure S4. Early bacteriological eradication of short-term penicillins compared to long-term penicillin therapy.

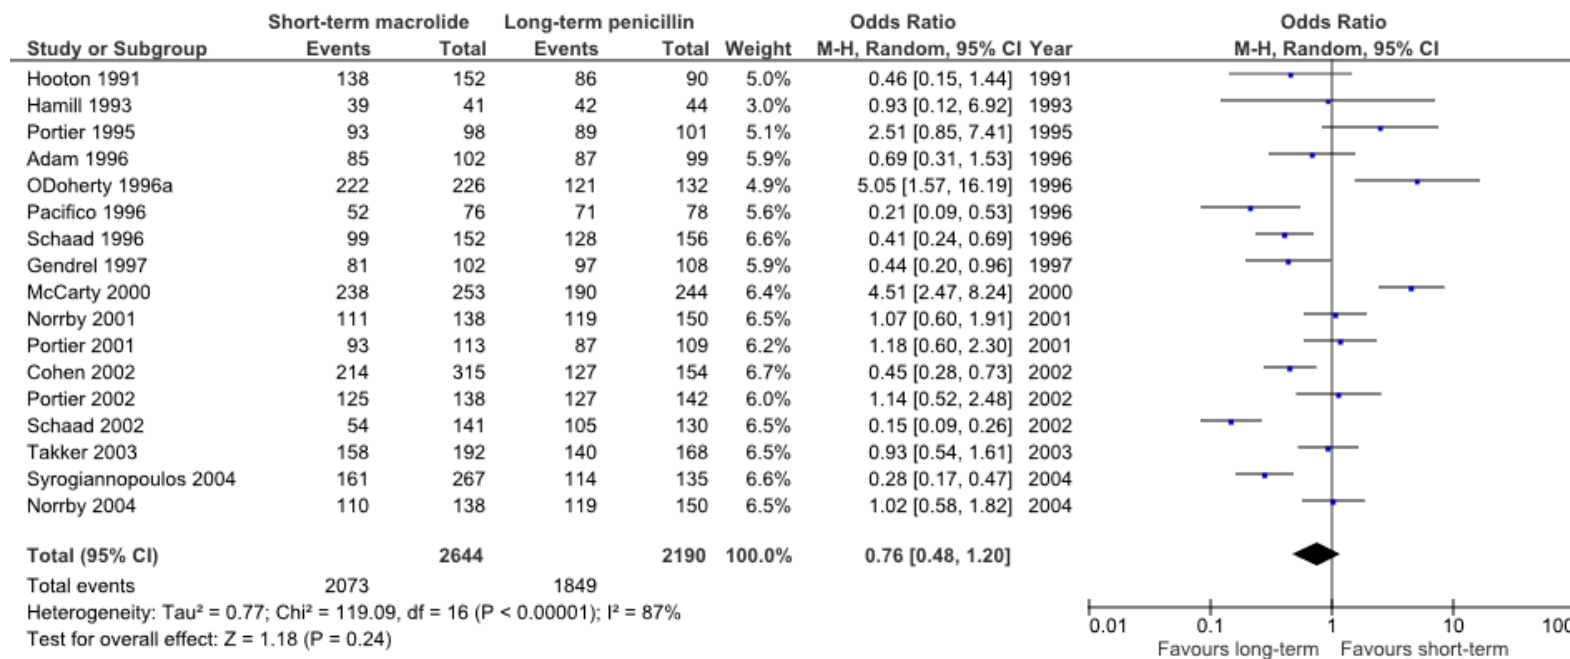

**Fig. 5. Early bacteriological eradication of short-term macrolides compared to long-term penicillin therapy**

Figure S5. Early bacteriological eradication of short-term macrolides compared to long-term penicillin therapy.

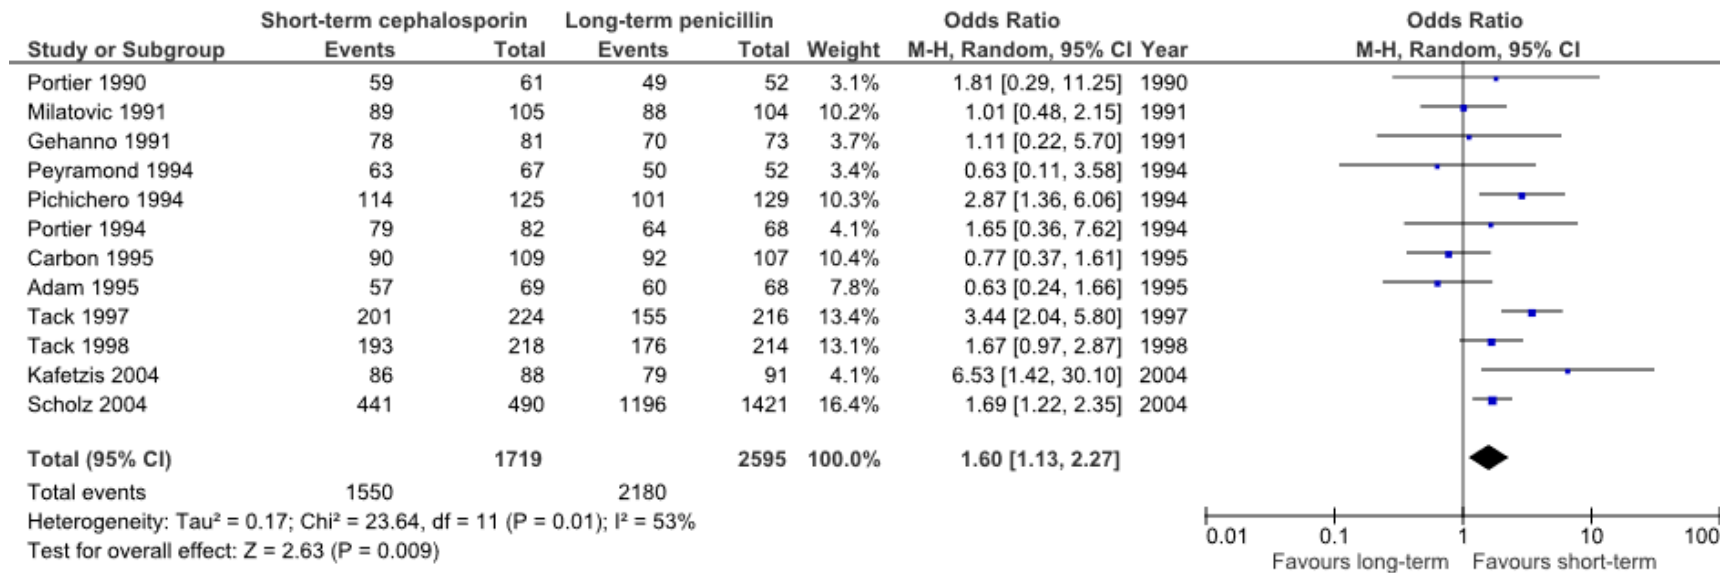

**Fig. 6. Early bacteriological eradication of short-term cephalosporins compared to long-term penicillin therapy**

Figure S6. Early bacteriological eradication of short-term cephalosporins compared to long-term penicillin therapy.

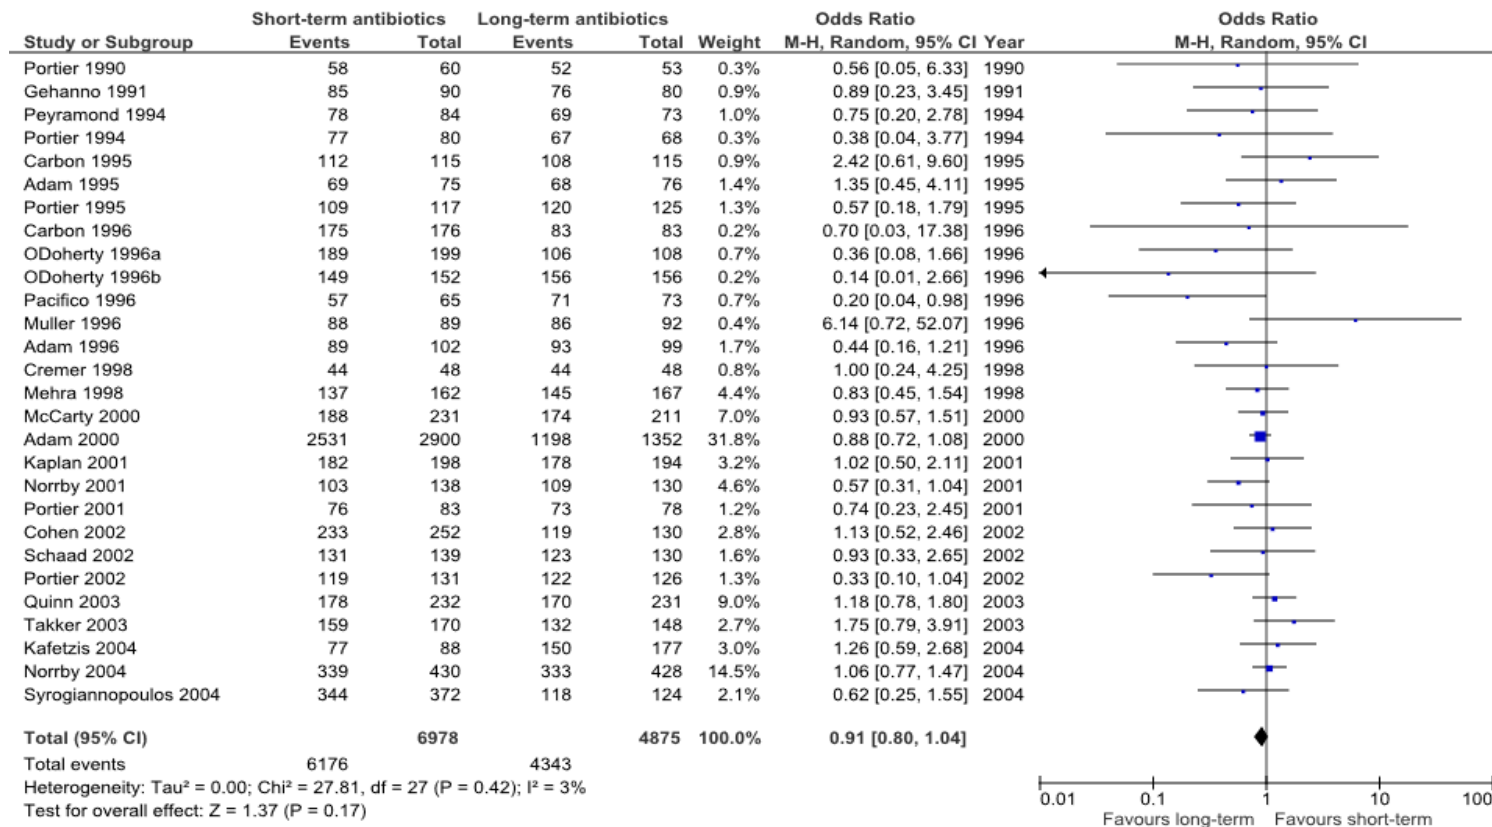

**Fig. 7. Late clinical cure of short-term antibiotic therapy compared to long-term regimen treatment**

**Figure S7. Late clinical cure of short-term antibiotic therapy compared to long-term regimen treatment**



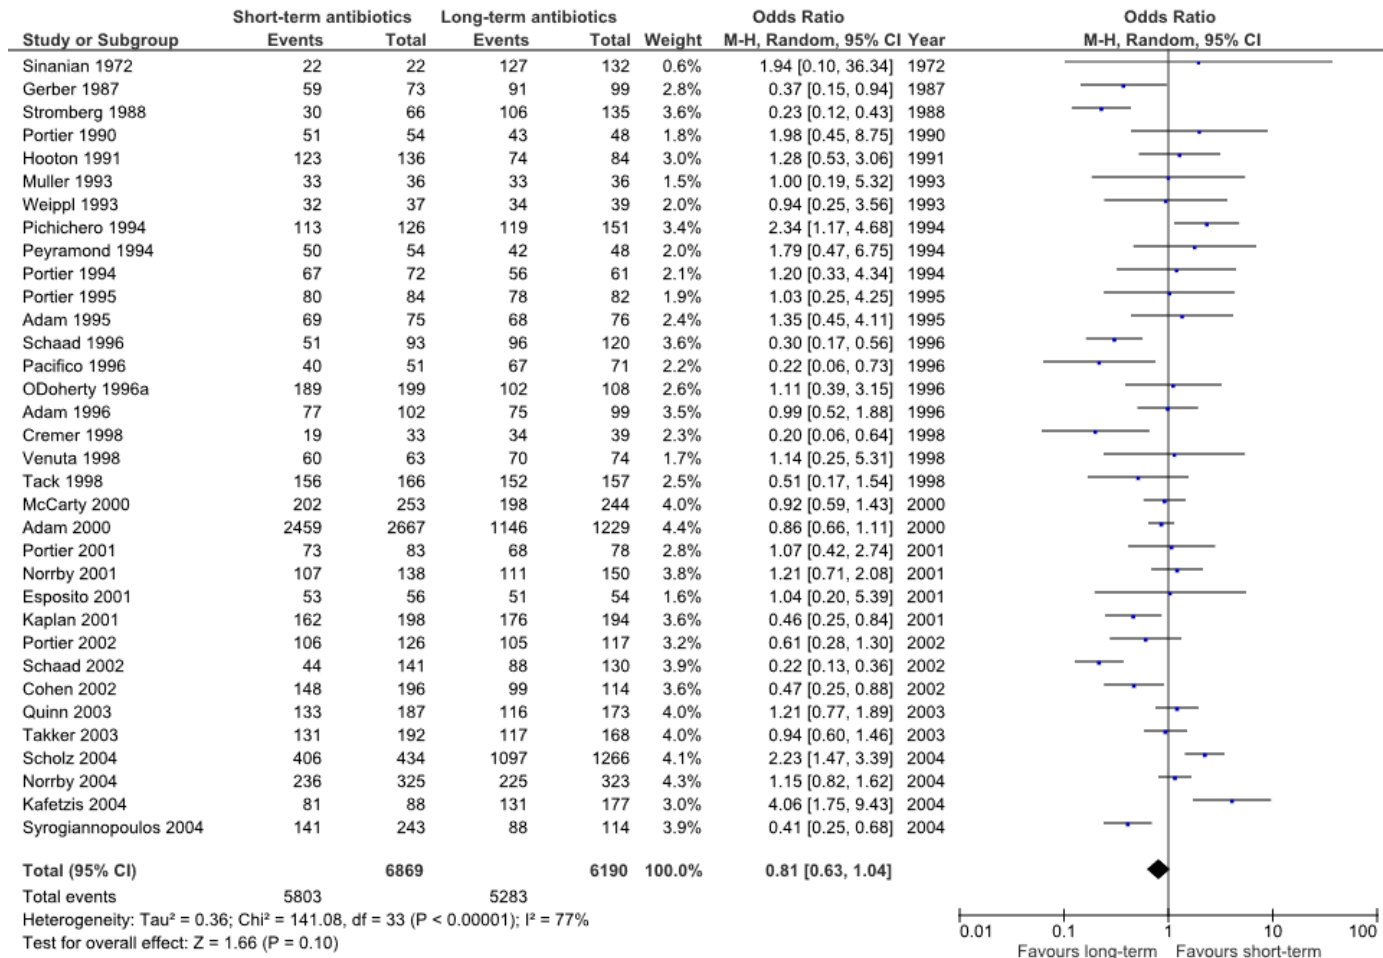

**Fig. 8. Late bacteriological eradication of short-term antibiotic therapy compared to long-term regimen treatment**

Figure S8. Late bacteriological eradication of short-term antibiotic therapy compared to long-term regimen treatment.

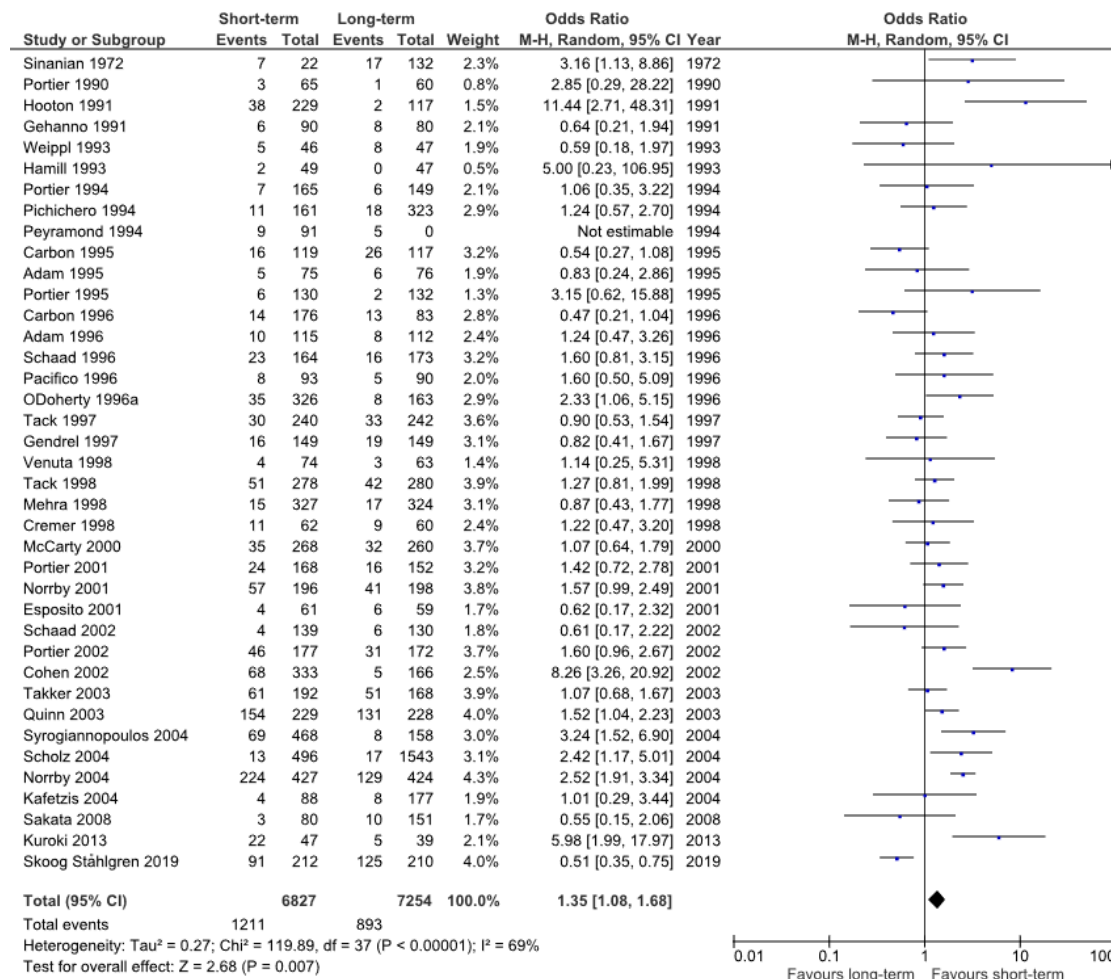

**Fig. 9. Adverse effects of short-term antibiotic therapy compared to long-term antibiotic therapy**

**Figure S9.** Adverse effects of short-term antibiotic therapy compared to long-term antibiotic therapy.
